# Supplementary material for: Self-powered all-quantum dot based broadband photodetectors for color imaging and heart rate monitoring
Source: Royal Society of Chemistry journal article supplement (doi:10.1039/d4tc01805b), 2024-01-01
Supplement: d4tc01805b1.pdf [file d4tc01805b1.pdf]

## Supporting Information

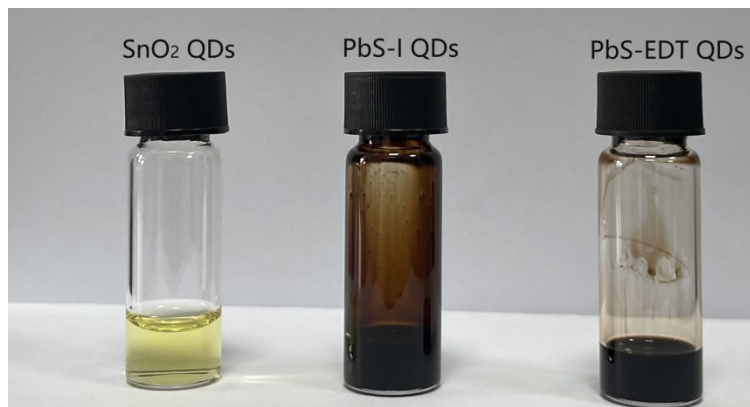

**Figure S1** The optical image of the SnO<sub>2</sub>, PbS-I and PbS-EDT QDs solutions.

**Figure S2** EDS elemental mapping of Pb, S, Sn and In.

**Figure S3** SEM images of the surface of the PD.

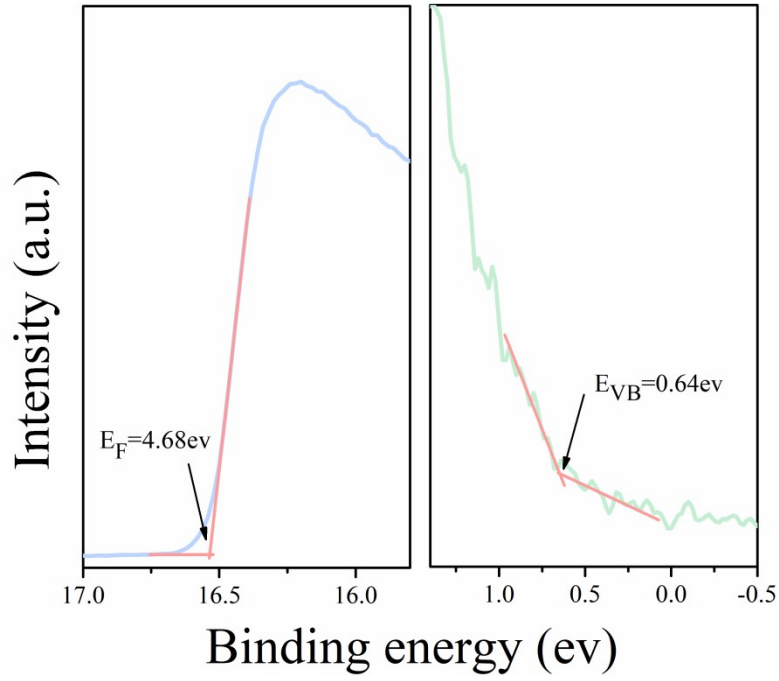

**Figure S4** UPS characterization of PbS-I.

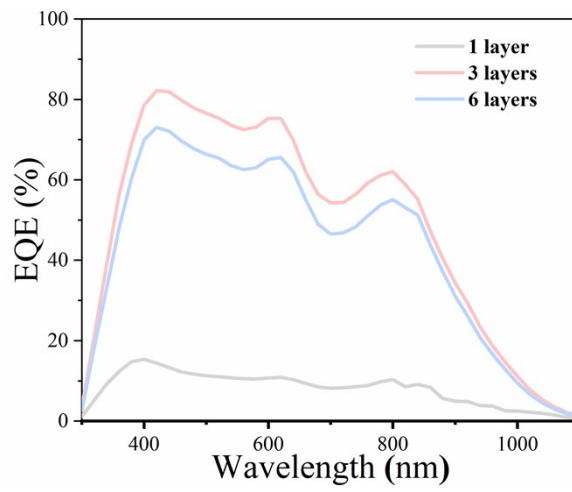

**Figure S5** EQE spectra of the SnO<sub>2</sub> QDs/PbS-I QDs/PbS-EDT QDs PD with different SnO<sub>2</sub> layer (1, 3, and 6 layers), respectively (0 V bias).

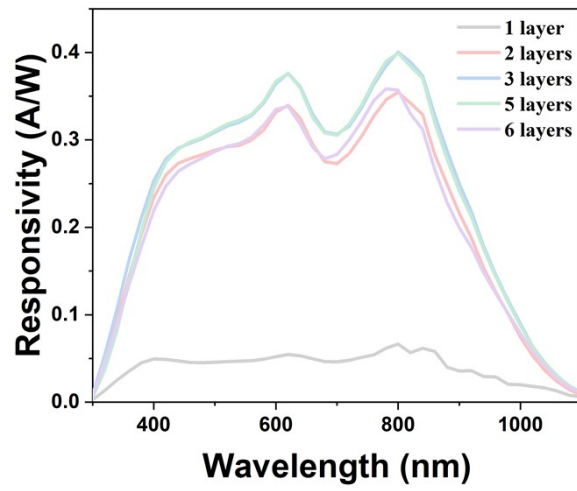

**Figure S6** Responsivity of the SnO<sub>2</sub> QDs/PbS-I QDs/PbS-EDT QDs PD with different SnO<sub>2</sub> layer, respectively (0 V bias).

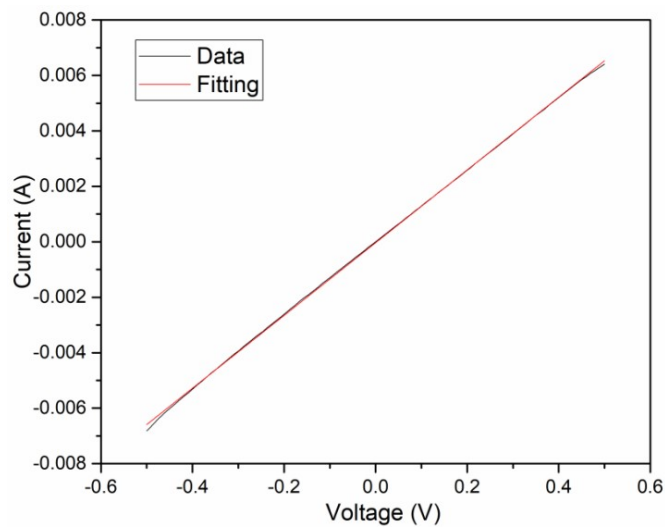

**Figure S7** I-V curves of SnO<sub>2</sub> film.

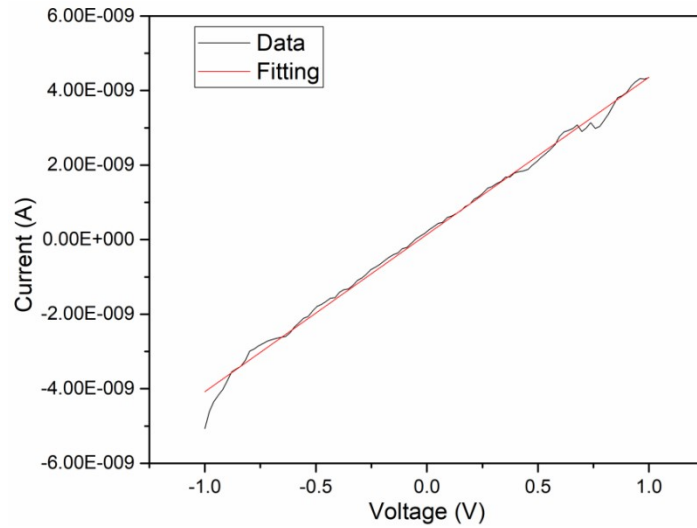

**Figure S8** I-V curves of PbS-EDT film.

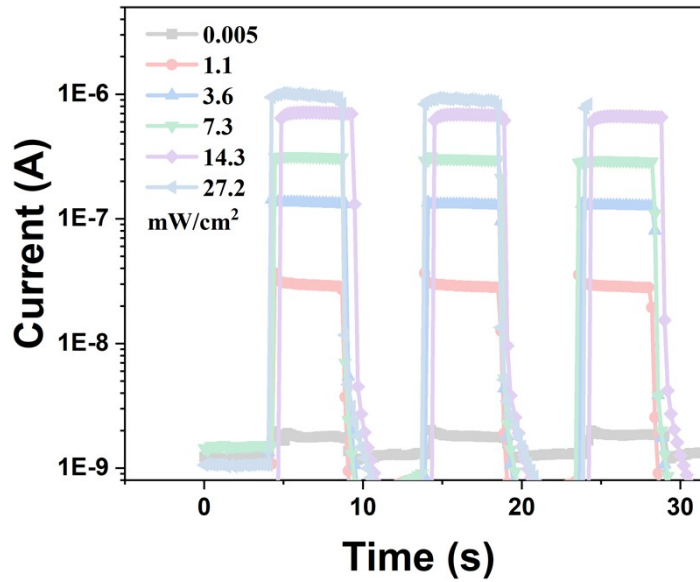

**Figure S9** I-T curves of the PD under 365 nm UV light.

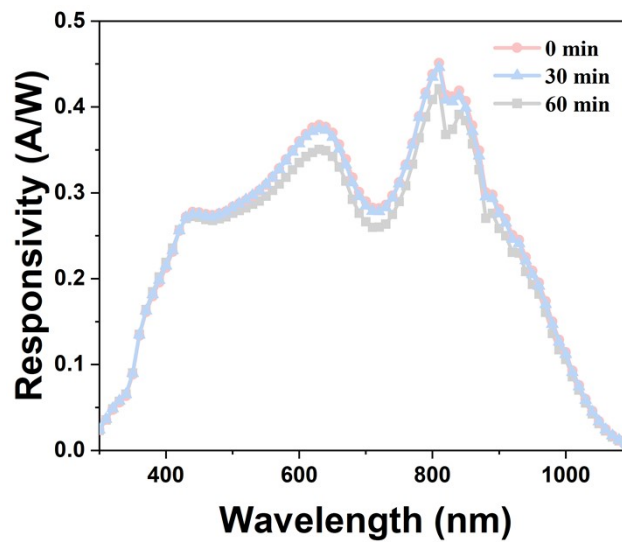

**Figure S10.** The responsivity spectra of our PD with continuous light illumination for

1 h.

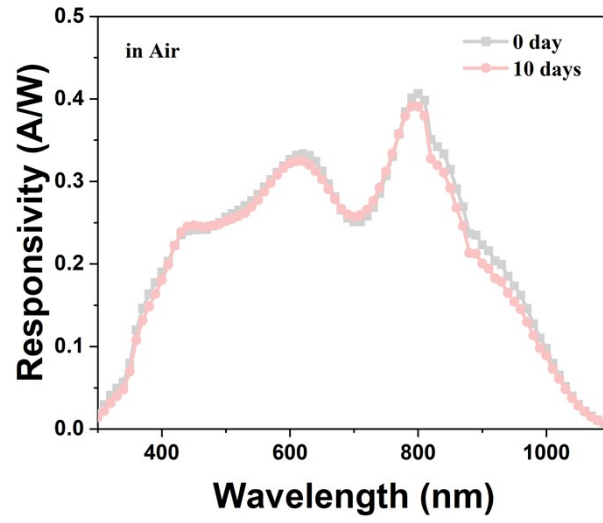

**Figure S11.** The responsivity spectra of our PD after 10 days stored in air.

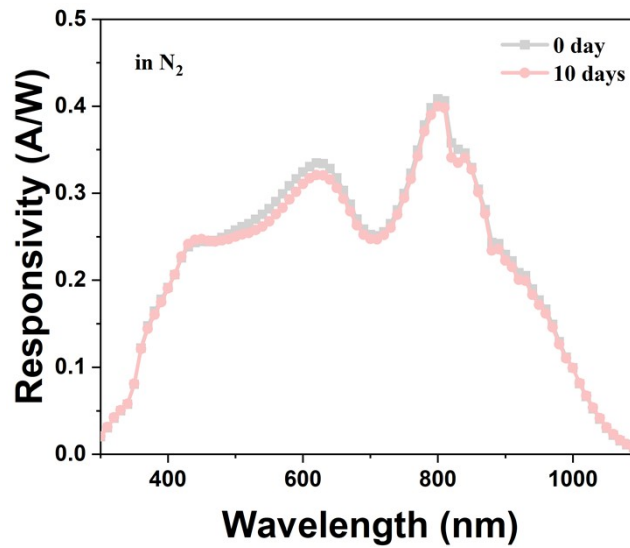

**Figure S12.** The responsivity spectra of our PD after 10 days stored in N<sub>2</sub>.

**Table S1** Energy band diagram of the employed materials with various SnO<sub>2</sub> width in the device, simulated by SCAPS, parameter as follows:

| Parameter      | PbS-EDT | PbS-I | SnO <sub>2</sub> |
|----------------|---------|-------|------------------|
| Thickness (nm) | 50      | 310   | 10/30/66         |
| Bandgap (eV)   | 1.25    | 1.33  | 3.6              |

|                                                        |                    |                    |                      |
|--------------------------------------------------------|--------------------|--------------------|----------------------|
| Electron affinity (eV)                                 | 3.7                | 3.99               | 4.04                 |
| Dielectric permittivity<br>(relative)                  | 20                 | 20                 | 9                    |
| CB effective density<br>of states (1/cm <sup>3</sup> ) | 5×10 <sup>19</sup> | 5×10 <sup>19</sup> | 2.2×10 <sup>18</sup> |
| VB effective density<br>of states (1/cm <sup>3</sup> ) | 5×10 <sup>19</sup> | 5×10 <sup>19</sup> | 1.8×10 <sup>19</sup> |
| Electron mobility (cm/Vs)                              | 5×10 <sup>-2</sup> | 1×10 <sup>-2</sup> | 1×10 <sup>2</sup>    |
| Hole mobility (cm/Vs)                                  | 5×10 <sup>-2</sup> | 1×10 <sup>-2</sup> | 2.5×10 <sup>1</sup>  |

---
